# Supplementary material for: DARPins recognize mTFP1 as novel reagents for in vitro and in vivo protein manipulations
Source: PubMed Central journal article supplement (PMC6262872; doi:10.1242/bio.036749), 2018-09-20
Supplement: biolopen-7-036749-s1.pdf [file biolopen-7-036749-s1.pdf]

**Figure S1****Structural analysis of the mTFP1/DARPin complex.**

**(A)** Sequences of selected DARPins. The sequences of DARPin 1238\_E11 and DARPin 1238\_G01 are shown. The top row indicates the consensus sequence used in the library with randomized positions indicated as X (randomization to all amino acids but Cys, Pro and Gly) and Z (randomization to Asn, His or Tyr), highlighted in black frames. In the lower lines, only residues that differ from the consensus sequence are printed. **(B)** Superposition of the DARPin 1238\_G01 (grey) and DARPin 1238\_E11 (rainbow-colored from N- (blue) to C-terminus (red)) ( $C_{\alpha}$  r.m.s.d. 0.3 Å). **(C)** Superposition of the DARPin 1238\_E11 (grey) and DARPin 1238\_E11 in complex with mTFP1 (lime) ( $C_{\alpha}$  r.m.s.d. 0.45 Å), minor differences are only observed for the two N-Cap helices. **(D)** Superposition of the mTFP1/DARPin 1238\_E11 and the GFP/ DARPin 3G61 complex (PDB ID: 5MAD) (Hansen et al., 2017). mTFP1 (teal), DARPin 1238\_E11 (grey), GFP (green) and anti-GFP DARPin 3G61 (rainbow coloured, from N-terminus blue to C-terminus red) are shown in cartoon representation. The mTFP1 chromophore is shown as a sphere. **(E)** Superposition of the mTFP/DARPin 1238\_E11 and the GFP/DARPin 3G124nc complex (PDB ID: 5MA8) (Hansen et al., 2017). mTFP1 (teal), DARPin 1238\_E11 (grey), GFP (green) and anti-GFP DARPin 3G124nc (rainbow coloured, from N-terminus blue to C-terminus red) are shown in cartoon representation. The mTFP1 chromophore is shown as a sphere.



### Nuclear colocalization

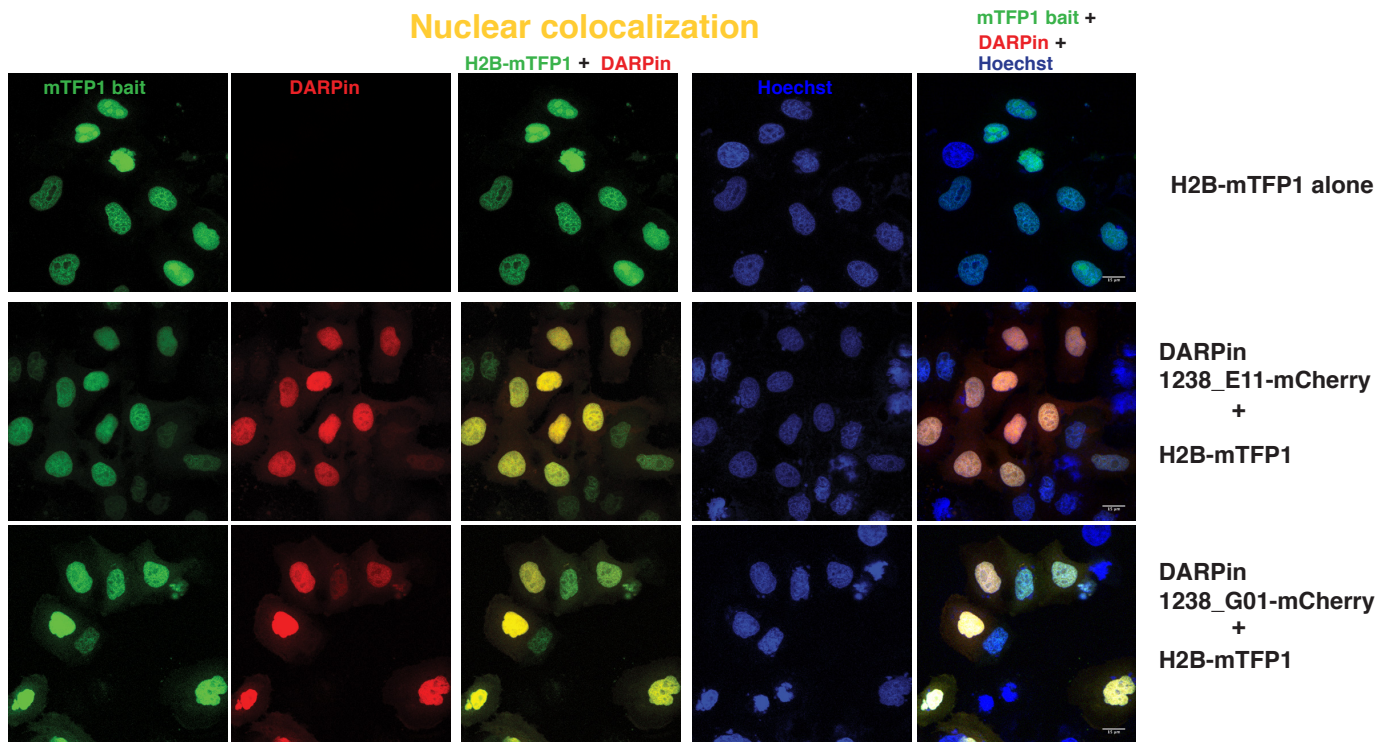

### Membrane colocalization

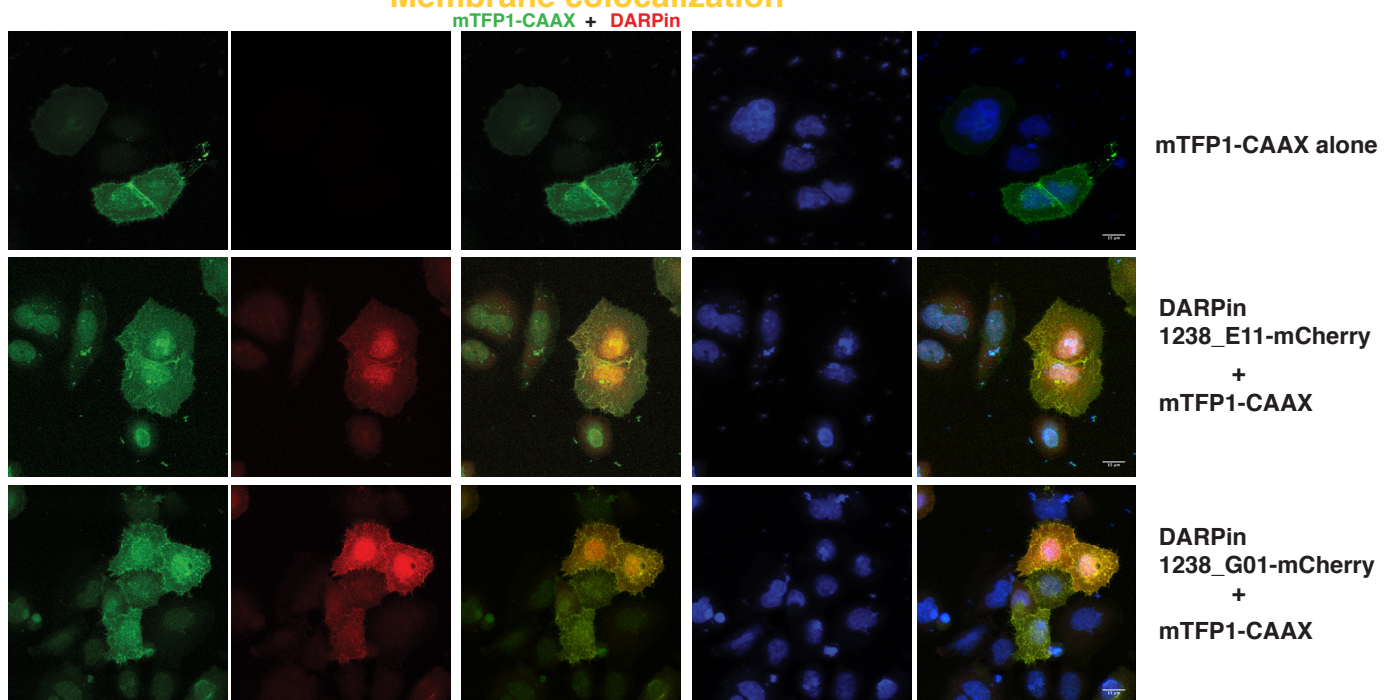

## Figure S2

### Intracellular binding of anti-mTFP1-DARPin

Confocal images of HeLa cells transiently transfected with pH2B-mTFP1 alone (first row) or with the combination of either pH2B-mTFP1 and pCMV-DARPin 1238\_E11-mCherry (second row) or pH2B-mTFP1 and pCMV-DARPin 1238\_G01-mCherry (third row), respectively; pmTFP1-CAAX alone (fourth row) or the combination of either pmTFP1-CAAX and pCMV-DARPin 1238\_E11-mCherry (fifth row) and or pmTFP1-CAAX and pCMV-DARPin 1238\_G01-mCherry (sixth row). The first column represents the mTFP1 bait (green), the second column is the mCherry DARPin channel (red), the third column is the overlay of the first two channels, showing the nuclear colocalization of the H2B-mTFP1 bait (second and third rows) or membrane colocalization of pmTFP1\_CAAX bait (fifth and sixth rows) with the respective DARPins. The fourth column represents the nuclear Hoechst staining (blue) and the fifth column is the merge of all three channels (with the scale bar in white (15  $\mu$ m) on the bottom right corner). Images were taken 24 hours post transfection. Transfected constructs are indicated at the right of each row and the single channels are indicated inside the panels of the first row. The merge channels are also indicated at the top of the respective columns. The figures are from a representative experiment, performed at least three times.



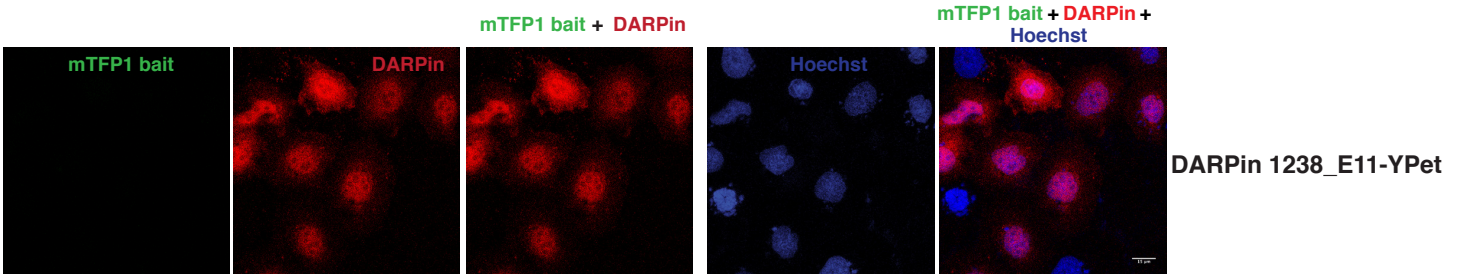

**Nuclear colocalization**

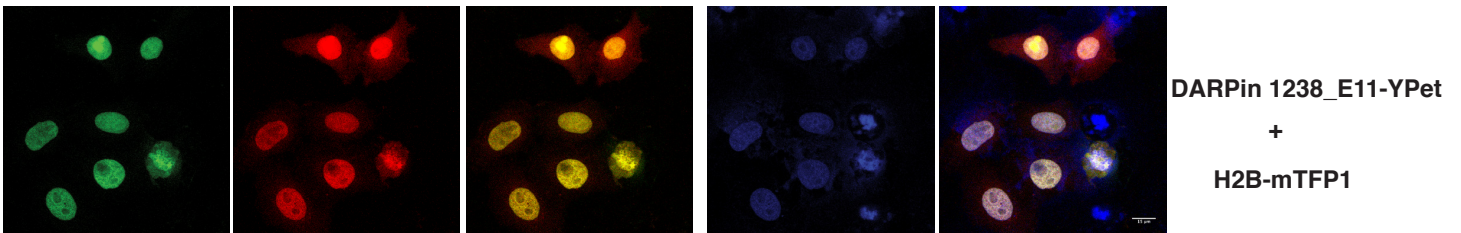

**Mitochondrial colocalization**

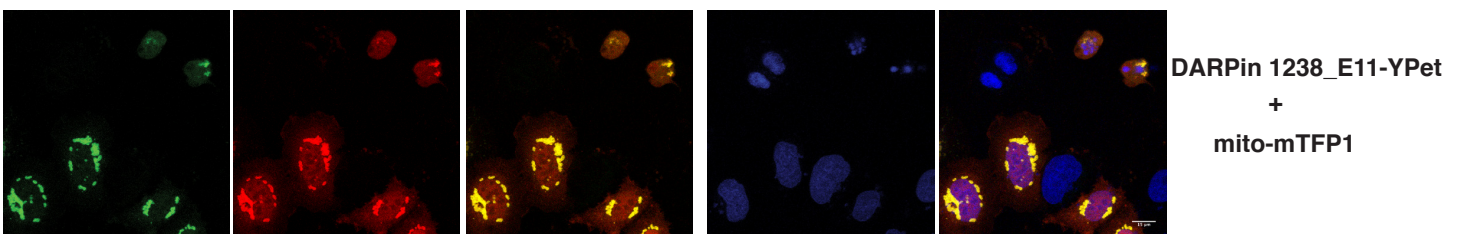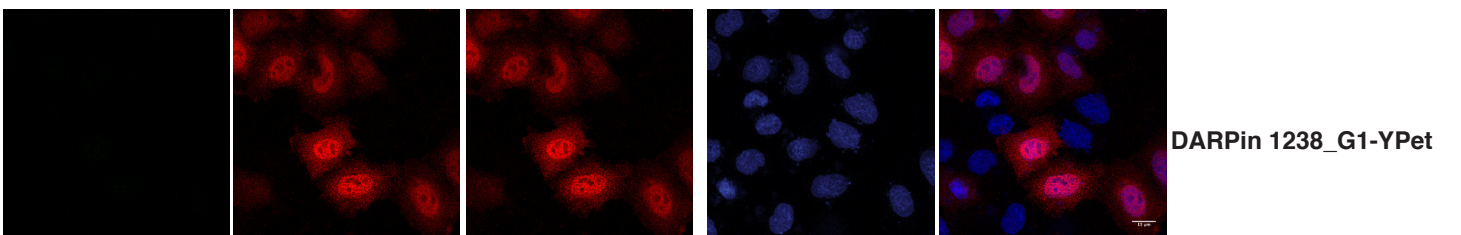

**Nuclear colocalization**

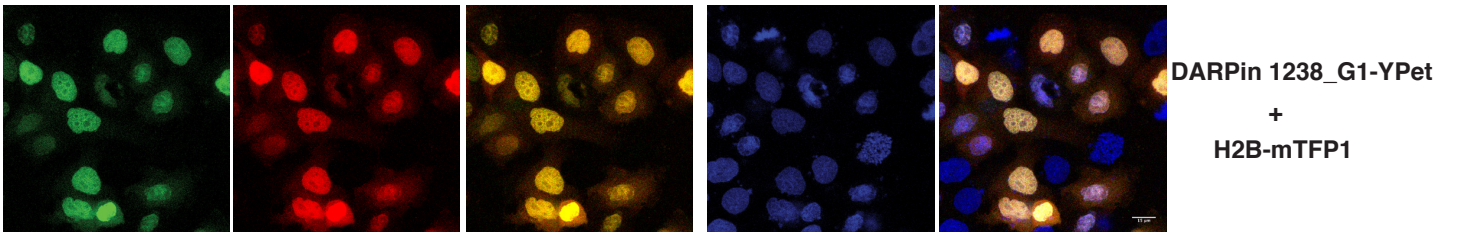

**Mitochondrial colocalization**

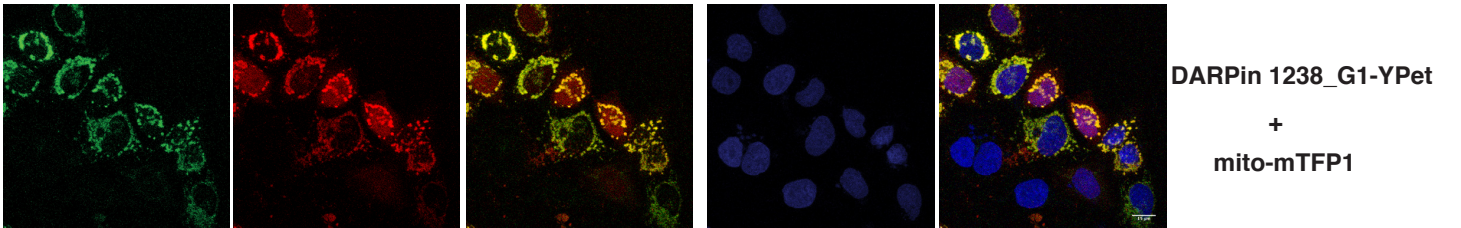

## Figure S3

### Intracellular binding of anti-mTFP1-DARPin-YPet

Confocal images of HeLa cells transiently transfected with pCMV-DARPin 1238\_E11\_YPet alone (first row) or in combination with pH2B-mTFP1 (second row) or mito-mTFP1 (third row). The same transfection scheme is presented for the DARPin 1238\_G01-YPet alone (fourth row) or in combination with H2B-mTFP1 (fifth row) or mito-mTFP1 (sixth row). The first column represents the mTFP1 channel (green), the second column is the YPet channel (red), the third column is the overlay of the two channels, showing the colocalization of the DARPin-YPet fusion to the different mTFP1 baits, the fourth column represents the nuclear Hoechst staining (blue) and the fifth column is the merge of all three channels (with the scale bar in white (15  $\mu\text{m}$ ) on the bottom right corner). Images were taken 24 hours post transfection. Transfected constructs are indicated at the right of each row and the single channels are indicated inside the panels of the first row. The merge channels are also indicated at the top of the respective columns. The figures are from a representative experiment, performed at least three times.

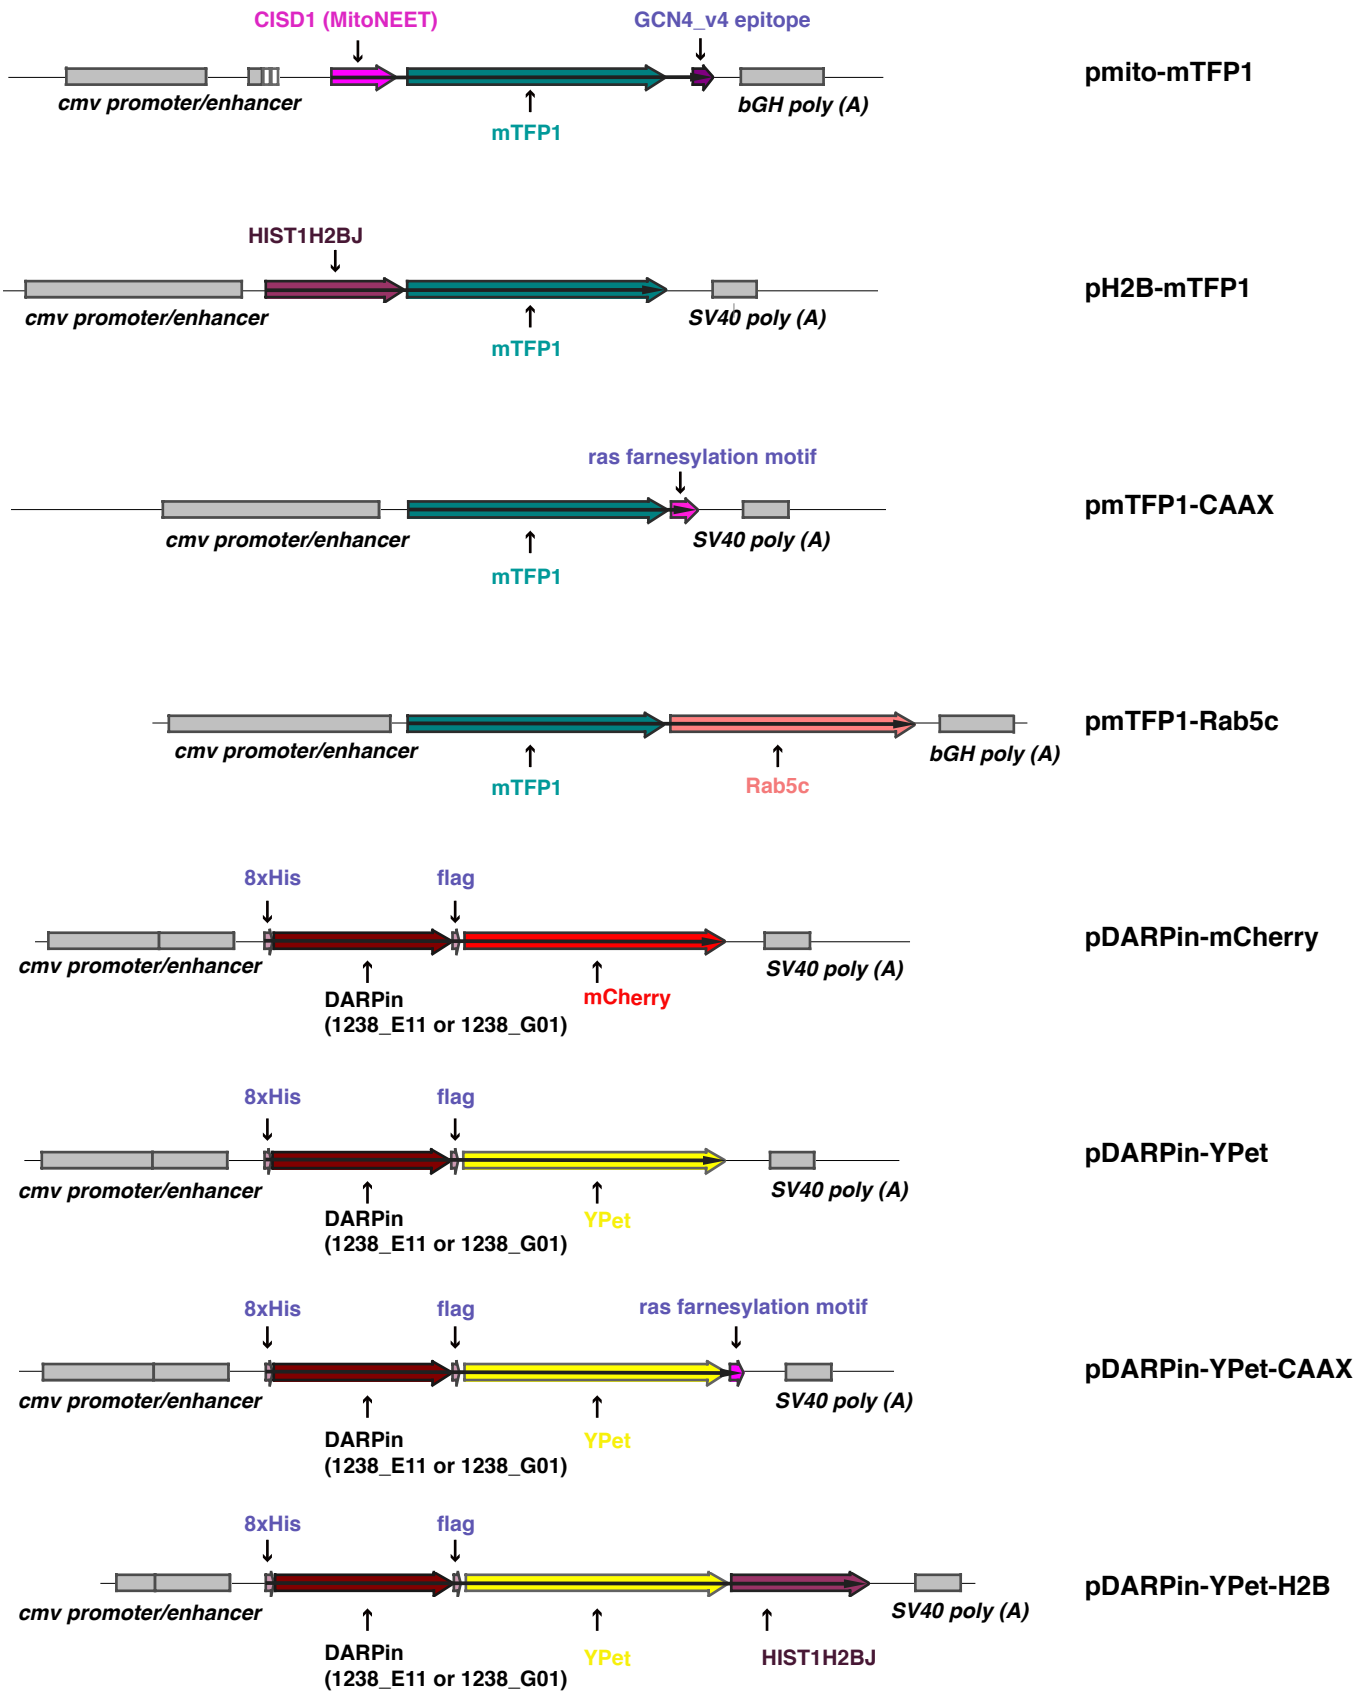

## **Figure S4**

### **Schematic representation of the fusion constructs**

The transcriptional elements (enhancer, promoter and poly (A) adenylation) of the different mammalian expression vectors are depicted as grey filled boxes. The different protein coding modules are represented as coloured block arrows, while the resulting fusion protein is depicted as a solid black arrow inside the modules. Full maps and sequences are available upon request.

**Table S1.** Statistics on diffraction data and refinement of DARPin 1238\_E11, DARPin 1238\_G01, and mTFP1/DARPin 1238\_E11 complexes.

| PDB Identifier            | mTFP1/<br>DARPin 1238_E11<br>(P6 <sub>5</sub> 22) | mTFP1/<br>DARPin 1238_E11<br>(C2) | DARPin<br>1238_E11<br>(P2 <sub>1</sub> ) | DARPin<br>1238_G01<br>(P2 <sub>1</sub> 2 <sub>1</sub> 2 <sub>1</sub> ) | DARPin<br>1238_G01<br>(I4)     |
|---------------------------|---------------------------------------------------|-----------------------------------|------------------------------------------|------------------------------------------------------------------------|--------------------------------|
|                           | 6FP7                                              | 6FP8                              | 6FP9                                     | 6FPA                                                                   | 6FPB                           |
| Wavelength (Å)            | 0.99986                                           | 0.99986                           | 1.00003                                  | 0.99986                                                                | 0.99986                        |
| Resolution range (Å)      | 45.45 - 1.58<br>(1.67 - 1.58)*                    | 39.61 - 1.85<br>(1.97 - 1.85)*    | 48.50 - 2.10<br>(2.16 - 2.10)*           | 44.58 - 1.58<br>(1.68 - 1.58)*                                         | 46.80 - 1.62<br>(1.72 - 1.62)* |
| Space group               | P 6 <sub>5</sub> 2 2                              | C2                                | P 2 <sub>1</sub>                         | P 2 <sub>1</sub> 2 <sub>1</sub> 2 <sub>1</sub>                         | I4                             |
| Unit cell                 | 99.1 99.1 214.6                                   | 136.0 75.0 48.3                   | 51.7 91.6<br>54.4                        | 38.0 89.2 103.8                                                        | 66.2 66.2<br>77.9              |
| α, β, γ (°)               | 90 90 120                                         | 90 90.7 90                        | 90 116.9 90                              | 90 90 90                                                               | 90 90 90                       |
| Total reflections         | 2190376 (327328)                                  | 187610 (28854)                    | 94272 (5694)                             | 426339<br>(39829)                                                      | 96928 (9216)                   |
| Unique reflections        | 161477 (25309)                                    | 78111 (12129)                     | 25698 (1843)                             | 92906 (9440)                                                           | 41912 (4096)                   |
| Multiplicity              | 13.5 (12.9)                                       | 2.4 (2.3)                         | 3.7 (3.1)                                | 4.6 (4.2)                                                              | 2.2 (2.2)                      |
| Completeness (%)          | 99.3 (96.4)                                       | 96.6 (93.1)                       | 99.4 (85.8)                              | 99.2 (97.0)                                                            | 99.3 (97.1)                    |
| Mean I/sigma(I)           | 13.6 (1.3)                                        | 11.2 (1.7)                        | 7.7 (2.1)                                | 14.1 (1.2)                                                             | 11.5 (1.3)                     |
| Wilson B-factor           | 22.1                                              | 29.8                              | 31.1                                     | 21.6                                                                   | 30.8                           |
| R-meas                    | 0.144 (1.98)                                      | 0.069 (0.730)                     | 0.273 (1.54)                             | 0.078 (1.19)                                                           | 0.066 (0.935)                  |
| CC1/2                     | 0.999 (0.572)                                     | 0.998 (0.652)                     | 0.975 (0.39)                             | 0.999 (0.51)                                                           | 0.998 (0.746)                  |
| R-work                    | 0.148 (0.272)                                     | 0.149 (0.237)                     | 0.162 (0.237)                            | 0.146 (0.306)                                                          | 0.152 (0.319)                  |
| R-free                    | 0.164 (0.287)                                     | 0.174 (0.251)                     | 0.205 (0.243)                            | 0.180 (0.310)                                                          | 0.175 (0.338)                  |
| Number of atoms           | 6929                                              | 6562                              | 5338                                     | 5450                                                                   | 2593                           |
| water                     | 732                                               | 444                               | 475                                      | 589                                                                    | 197                            |
| Protein residues          | 386                                               | 384                               | 334                                      | 321                                                                    | 159                            |
| RMS(bonds)                | 0.005                                             | 0.012                             | 0.008                                    | 0.006                                                                  | 0.009                          |
| RMS(angles)               | 0.92                                              | 1.20                              | 0.81                                     | 0.86                                                                   | 1.02                           |
| Ramachandran favored (%)  | 99.0                                              | 99.2                              | 99.4                                     | 99.7                                                                   | 98.1                           |
| Ramachandran outliers (%) | 0                                                 | 0                                 | 0                                        | 0                                                                      | 0                              |
| Clashscore                | 1.13                                              | 1.62                              | 1.18                                     | 0.62                                                                   | 1.67                           |
| Average B-factor          | 35.0                                              | 40.0                              | 24.0                                     | 29.0                                                                   | 47.0                           |

\*The values in parentheses correspond to the highest resolution shell.

**Table S2**[Click here to Download Table S2](#)
